# Supplementary material
Source: MDPI journal article supplement (https://www.mdpi.com/2304-6767/6/4/56)
Supplement: s1 [file s1]

**Appendix: Extract from the SMILE questionnaires**  
**Wave 1 Baseline questionnaire:**

**Confounding factors: SES**

| <b>E7</b>                                                                             | <p><b>Please complete the table below.</b></p> <p>If your child lives in a <u>one-parent household</u>, please fill in one column for yourself (Mother).</p> <p>If your child lives in a <u>two-parent household</u>, please fill in a column for yourself (Mother) and a column for your partner (Other Parent /Guardian).</p>                                                                                                                                                        |                                                                                                                                                                                                                                                                                                                                                                                                                                                                                        |
|---------------------------------------------------------------------------------------|----------------------------------------------------------------------------------------------------------------------------------------------------------------------------------------------------------------------------------------------------------------------------------------------------------------------------------------------------------------------------------------------------------------------------------------------------------------------------------------|----------------------------------------------------------------------------------------------------------------------------------------------------------------------------------------------------------------------------------------------------------------------------------------------------------------------------------------------------------------------------------------------------------------------------------------------------------------------------------------|
| QUESTIONS                                                                             | ↓ Mother                                                                                                                                                                                                                                                                                                                                                                                                                                                                               | ↓ Other Parent/Guardian                                                                                                                                                                                                                                                                                                                                                                                                                                                                |
| <b>a) What is <u>your</u> age?</b>                                                    | ..... Years Old                                                                                                                                                                                                                                                                                                                                                                                                                                                                        | ..... Years Old                                                                                                                                                                                                                                                                                                                                                                                                                                                                        |
| <b>b) What is your sex?</b><br>(Tick one box only)                                    | <input type="checkbox"/> <sub>1</sub> Male<br><input type="checkbox"/> <sub>2</sub> Female                                                                                                                                                                                                                                                                                                                                                                                             | <input type="checkbox"/> <sub>1</sub> Male<br><input type="checkbox"/> <sub>2</sub> Female                                                                                                                                                                                                                                                                                                                                                                                             |
| <b>c) In which country were you born?</b>                                             | <input type="checkbox"/> <sub>1</sub> Australia<br><input type="checkbox"/> <sub>2</sub> Other country (please specify)<br>.....                                                                                                                                                                                                                                                                                                                                                       | <input type="checkbox"/> <sub>1</sub> Australia<br><input type="checkbox"/> <sub>2</sub> Other country (please specify)<br>.....                                                                                                                                                                                                                                                                                                                                                       |
| <b>d) Is English your first language?</b>                                             | <input type="checkbox"/> <sub>1</sub> Yes<br><input type="checkbox"/> <sub>2</sub> No<br>Please specify what other language(s) you speak at home?<br>.....                                                                                                                                                                                                                                                                                                                             | <input type="checkbox"/> <sub>1</sub> Yes<br><input type="checkbox"/> <sub>2</sub> No<br>Please specify what other language(s) you speak at home?<br>.....                                                                                                                                                                                                                                                                                                                             |
| <b>e) Are you of Aboriginal or Torres Strait Islander origin?</b> (Tick one box only) | <input type="checkbox"/> <sub>1</sub> No<br><input type="checkbox"/> <sub>2</sub> Yes, Aboriginal<br><input type="checkbox"/> <sub>3</sub> Yes, Torres Strait Islander<br><input type="checkbox"/> <sub>4</sub> Yes, Aboriginal & Torres Strait Islander                                                                                                                                                                                                                               | <input type="checkbox"/> <sub>1</sub> No<br><input type="checkbox"/> <sub>2</sub> Yes, Aboriginal<br><input type="checkbox"/> <sub>3</sub> Yes, Torres Strait Islander<br><input type="checkbox"/> <sub>4</sub> Yes, Aboriginal & Torres Strait Islander                                                                                                                                                                                                                               |
| <b>f) What is the highest level of education you have?</b><br>(Tick one box only)     | <input type="checkbox"/> <sub>1</sub> Some high school<br><input type="checkbox"/> <sub>2</sub> Completed high school<br><input type="checkbox"/> <sub>3</sub> Some vocational training (i.e. trade)<br><input type="checkbox"/> <sub>4</sub> Completed vocational training<br><input type="checkbox"/> <sub>5</sub> Some University or College<br><input type="checkbox"/> <sub>6</sub> Completed University or College<br><input type="checkbox"/> <sub>7</sub> Postgraduate         | <input type="checkbox"/> <sub>1</sub> Some high school<br><input type="checkbox"/> <sub>2</sub> Completed high school<br><input type="checkbox"/> <sub>3</sub> Some vocational training (i.e. trade)<br><input type="checkbox"/> <sub>4</sub> Completed vocational training<br><input type="checkbox"/> <sub>5</sub> Some University or College<br><input type="checkbox"/> <sub>6</sub> Completed University or College<br><input type="checkbox"/> <sub>7</sub> Postgraduate         |
| <b>g) What is your current work status?</b> (Tick one box only)                       | <input type="checkbox"/> <sub>1</sub> Full time employed prior to this birth<br><input type="checkbox"/> <sub>2</sub> Part time employed prior to this birth<br><input type="checkbox"/> <sub>3</sub> Unemployed (please go to E8)<br><input type="checkbox"/> <sub>4</sub> Home duties (please go to E8)<br><input type="checkbox"/> <sub>5</sub> Pensioner                                                                                                                           | <input type="checkbox"/> <sub>1</sub> Full time employed<br><input type="checkbox"/> <sub>2</sub> Part time employed<br><input type="checkbox"/> <sub>3</sub> Unemployed (please go to E8)<br><input type="checkbox"/> <sub>4</sub> Home duties (please go to E8)<br><input type="checkbox"/> <sub>5</sub> Pensioner                                                                                                                                                                   |
| <b>h) What is your main occupation?</b>                                               | <input type="checkbox"/> <sub>1</sub> Manager / Administrator<br><input type="checkbox"/> <sub>2</sub> Professional<br><input type="checkbox"/> <sub>3</sub> Para-professional / Trade person<br><input type="checkbox"/> <sub>4</sub> Clerk / Salesperson /Personal service worker<br><input type="checkbox"/> <sub>5</sub> Plant / Machine operator / Drivers<br><input type="checkbox"/> <sub>6</sub> Manual worker / Labourer<br><input type="checkbox"/> <sub>7</sub> Other ..... | <input type="checkbox"/> <sub>1</sub> Manager / Administrator<br><input type="checkbox"/> <sub>2</sub> Professional<br><input type="checkbox"/> <sub>3</sub> Para-professional / Trade person<br><input type="checkbox"/> <sub>4</sub> Clerk / Salesperson /Personal Service worker<br><input type="checkbox"/> <sub>5</sub> Plant / Machine operator / Drivers<br><input type="checkbox"/> <sub>6</sub> Manual worker / Labourer<br><input type="checkbox"/> <sub>7</sub> Other ..... |

**E8** Which category does your total household income (before tax) fall into? Include any salaries, pensions, allowances, benefits, etc from all persons in the household. *(Please tick one box only)*

**Household income per year**

- |                                                             |                                                              |
|-------------------------------------------------------------|--------------------------------------------------------------|
| <input type="checkbox"/> <sub>1</sub> Up to \$20,000        | <input type="checkbox"/> <sub>6</sub> \$100,001 to \$120,000 |
| <input type="checkbox"/> <sub>2</sub> \$20,001 to \$40,000  | <input type="checkbox"/> <sub>7</sub> \$120,001 to \$140,000 |
| <input type="checkbox"/> <sub>3</sub> \$40,001 to \$60,000  | <input type="checkbox"/> <sub>8</sub> \$140,001 to \$160,000 |
| <input type="checkbox"/> <sub>4</sub> \$60,001 to \$80,000  | <input type="checkbox"/> <sub>9</sub> \$160,001 to \$180,000 |
| <input type="checkbox"/> <sub>5</sub> \$80,001 to \$100,000 | <input type="checkbox"/> <sub>10</sub> Over \$180,000        |

**Wave 4 questionnaire (age 12 months)**

**Exposure variable: Lay support**

**B32. These statements relate to the support you get from other people.**

*(Please tick one box only for each statement)*

**Strongly  
disagree**

**Strongly  
agree**

There is a special person who is around when I am in need.

☐<sub>1</sub>

☐<sub>2</sub>

☐<sub>3</sub>

☐<sub>4</sub>

☐<sub>5</sub>

## Wave 5 questionnaire (age of 24 months)

### Exposure variable: Visit for dental advice

**A12** How many times has YOUR CHILD been seen by a healthcare professional about his/her teeth and/or gums in the last 12 months? *(This includes a dentist, dental therapist, GP or nurse)*

..... times

The child has not been seen about his/her teeth

☐\_1

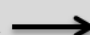

**PLEASE GO TO A15**

**A13** Who did YOUR CHILD see at the last dental visit?

Private Dentist

☐\_1

Child and Youth Health nurse

☐\_4

School Dental Service dentist/therapist

☐\_2

Other

☐\_5

General Practitioner (GP)

☐\_3

*(Please specify)* .....

**A14** What was the reason for the visit?

Check-up /Oral hygiene instruction

☐\_1

Other

☐\_3

Dental pain

☐\_2

*(Please specify)* .....

### Outcome variable: Brushing before bed

#### PART A: YOUR CHILD'S DENTAL BEHAVIOURS AND PRACTICES

In this section we would like you to answer some questions about your child's teeth and mouth.

**A1** Were YOUR CHILD's teeth brushed before bed yesterday?

Yes ☐\_1

No ☐\_2

### Outcome variable: Putting to bed with a bottle

**E2** How often do you put YOUR CHILD to bed with a bottle? *(tick one box only)*

At most bedtimes, including naps ☐\_1

Only occasionally at bedtimes, including naps ☐\_4

At most night bedtimes, but not daytime naps ☐\_2

Never ☐\_5

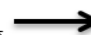

**PLEASE GO TO E4**

At most daytime naps, but not night bedtimes ☐\_3

**E3** What is usually in the bottle? *(tick one box only)*

Formula or toddler milk ☐\_1

Fruit juice/juice drinks ☐\_4

Expressed breast milk ☐\_2

Water ☐\_5

Cow's milk ☐\_3

Other, please specify.....

**E4** Apart from a bottle, do you feed YOUR CHILD any snacks just before bed (after toothbrushing)?

Yes ☐\_1 *→ (Please answer question below)*

No ☐\_2

If yes, please list what snacks you feed your child in the space provided below

.....

.....
